# Supplementary material for: Circular RNA ame_circ_2015 Function as microRNA Sponges in Regulating Egg-Laying of Honeybees (Apis mellifera)
Source: MDPI journal article supplement (doi:10.3390/life13010161), 2023-01-05
Supplement: s1 [file s1]

Table S1 Sequence information of ame\_circ\_2015

| Type              | information                                                                                                                                                                                                                                                                                                                                                                                                                                                                                                                                                                                                                                                                                                                                                                                                                                                                                                                                                                                                                                                                                                                                                                                                                                                                                          |
|-------------------|------------------------------------------------------------------------------------------------------------------------------------------------------------------------------------------------------------------------------------------------------------------------------------------------------------------------------------------------------------------------------------------------------------------------------------------------------------------------------------------------------------------------------------------------------------------------------------------------------------------------------------------------------------------------------------------------------------------------------------------------------------------------------------------------------------------------------------------------------------------------------------------------------------------------------------------------------------------------------------------------------------------------------------------------------------------------------------------------------------------------------------------------------------------------------------------------------------------------------------------------------------------------------------------------------|
| Name              | ame_circ_0002015                                                                                                                                                                                                                                                                                                                                                                                                                                                                                                                                                                                                                                                                                                                                                                                                                                                                                                                                                                                                                                                                                                                                                                                                                                                                                     |
| Chromosome        | LG11                                                                                                                                                                                                                                                                                                                                                                                                                                                                                                                                                                                                                                                                                                                                                                                                                                                                                                                                                                                                                                                                                                                                                                                                                                                                                                 |
| Parental gene     | <i>Apis mellifera</i> zinc finger protein ush ( <i>LOC100577801</i> )                                                                                                                                                                                                                                                                                                                                                                                                                                                                                                                                                                                                                                                                                                                                                                                                                                                                                                                                                                                                                                                                                                                                                                                                                                |
| Circled exons     | Circled by three exons of <i>LOC100577801</i> (170779..171035, 171250..171646, 171910..172647)                                                                                                                                                                                                                                                                                                                                                                                                                                                                                                                                                                                                                                                                                                                                                                                                                                                                                                                                                                                                                                                                                                                                                                                                       |
| Junction site     | GACGAGGAGAAGTCGAACAAATTCGAGGGGGAGGATGAGGA<br>ATGGAGCGACTCG                                                                                                                                                                                                                                                                                                                                                                                                                                                                                                                                                                                                                                                                                                                                                                                                                                                                                                                                                                                                                                                                                                                                                                                                                                           |
| miRNA target site | AAGACTGA                                                                                                                                                                                                                                                                                                                                                                                                                                                                                                                                                                                                                                                                                                                                                                                                                                                                                                                                                                                                                                                                                                                                                                                                                                                                                             |
| Sequence          | 5'GGGGAGGATGAGGAATGGAGCGACTCGGAGAAGACACCTT<br>CGGTGAGCAGTGGAGTGGAGGGCGGTGGATCGGCGGTCTCG<br>AGCCCGATCGCGCCGATCGTCGAAGAGGAATCGAGTTTGCCG<br>CCACCGCCGAGACTGAACCCCCCTTCCTCGTCGGTTGTGATCG<br>CGAATTCGGCCGCTGAGGATATCAGATTGAGGCTCAGCGTTCT<br>CTCTGAAGATGCTCGGAAACGGCTGGCTAGTCTCACCGAGGA<br>TATCGAGGGTCGCGAGAAGTTTGAGAGACCGACATGCAGCGC<br>CAAGGGCCAATCAAACCCGAGAATCGAGCCCGAAGGACACG<br>GACGAGGATTCCAACATGGTGGTGGTCAAGGAAGAGGATTGC<br>CAGCCGAGGTCGTCGTCCTCCTCGTCTTCCTCGACCAGAAGG<br>CGGGAGTCCGTGTGCAGGAGGGACTCGGAGGACTCCTCGAG<br>ACGATCGAACGCGGACGAGACACCGTCGGAGAAAAAGCTGA<br>AACTCGATGATGAAGCAGCACCAAGACTGAGACTCAATGCTA<br>GTCTGGCGACGGATCCCGCGCTTCGGCCCGCCGCTGTAGCCG<br>CGCTCACCGTCAAACCGGAAAATACCTCGCCGCCGAATCCTG<br>TGCCACCCCTGCCGGCTGGACTTCAGAACGGGTAACTATATTG<br>CAATCATTAGATCGAATAGAGATTTCTTCTAGACGTATTTATGC<br>CGGGAAAAAATGCTAGAAAGAAGGGAAAGATAGATTAGATCG<br>GTAATTCTGTGTTAAATCGCAATAGTTTCATTCTTTCCAATCC<br>AACAATTTCAAAGATCAACGTGGTTCCAAACGATATATCATCG<br>TCCTATCTGCTCGCGTATCATACATAAACTGCATGCAAAAGTA<br>TACGTAACTGAGTGGAAGCGGACCAACGTTGCAGGCGATCGC<br>GTCGGGTCGGCTGTTCGTGCTGCCAACCGACGGCAAGGAGAC<br>GATCACGGTGGAGCCAGCCAGGCCGGCGCCCCCTCATCTGCCC<br>GCCATGCGGCATCCGCTTTAGCTCGGCGAGCACCTCGAGGC<br>GCATCGCACCTTCTACTGCGCCCATCGTCCTCGGCTCGAGGAG<br>GAGGCGGCCAACGAGGAGGACGAGGAGAAGTCGAACAAATT<br>CGAG3' |
